# Supplementary material for: Reciprocal interactions between CA1 pyramidal and axo-axonic cells control sharp wave-ripple events
Source: Research Square preprint supplement (doi:10.21203/rs.3.rs-5844238/v1), 2025-02-13
Supplement: Supplementary file 1 [file 0e78529b38a484ddb5ade705.xlsx]

## Sheet: Sheet1
cumul_ID	cumul_pos_aac	cumul_t2p_aac	cumul_abratio_aac	cumul_FR_aac	cumul_isi_aac	cumul_burstiness_aac	cumul_thetam_aac	cumul_thetar_aac	cumul_thetap_aac	cumul_BLFR_aac	cumul_RIPFR_aac	cumul_ripzeta_aac	cumul_ripplem_aac	cumul_rippler_aac	cumul_ripplep_aac	cumul_ripmodCE_aac	cumul_ripspkmean_aac	cumul_ripisi_aac	cumul_RipTTFS_aac	cumul_ripmodpremonoCE_aac	cumul_ratepowercorr_aac	cumul_ripratepowcorrpremono	cumul_rippler_premono	cumul_meanpremonotransprob
1_6	-129.704	0.358333	0.517676	2.4566	4.19404	0.0332253	2.82784	0.280854	2.44596e-49	1.75066	2.1709	0.0012897	4.86022	0.202333	3.77959e-10	0.958107	1.05895	0.0347049	-0.00176092	0	0.0136342	0
1_8	-4.70361	0.275	0.305689	2.44617	8.63185	0.17453	2.55697	0.285235	8.42426e-24	1.04322	1.68301	6.33823e-05	1.25206	0.293629	1.22398e-15	1.15801	1.04735	0.0212235	0.00139675	0	0.0291892	0
2_4	512.149	0.533333	0.0971591	3.13959	5.49954	0.00758246	5.91466	0.160497	5.31792e-16	2.41716	1.63287	1.11132e-07	0.94612	0.0940267	0.0502646	0.947398	1.10922	0.0234656	0.00204983	0	-0.0721998	0
2_5	87.149	0.191667	0.54831	18.8701	285.714	0.662134	2.63755	0.340755	0	5.79131	53.7993	0.000112	4.25187	0.379023	0	1.81936	3.6459	0.0105001	-0.0140983	1.88814	0.41573	0.123539	0.3548	0.0652585
3_5	-25.604	0.183333	0.194944	7.48246	14.7856	0.0455267	2.44038	0.216182	1.85771e-62	5.67776	18.3742	1.11022e-16	4.70592	0.568782	0	1.53469	1.69417	0.0216313	-0.00854789	1.96893	0.167669	0.113526	0.319156	0.0352442
3_7	74.396	0.366667	0.264573	22.5559	173.41	0.595112	2.84828	0.220348	1.06059e-134	8.29377	59.0777	1.49046e-06	4.42014	0.360145	0	2.06783	3.73713	0.0107629	-0.0165232	2.65271	0.410883	0.15476	0.392844	0.0347731
3_8	-25.604	0.283333	0.361983	12.1384	151.515	0.616531	3.1241	0.126298	2.37566e-11	3.5519	10.6891	0.0144191	4.79041	0.308595	8.65651e-74	1.46882	1.68276	0.0195822	-0.00626703	2.1878	0.141037	0.139117	0.334479	0.0317477
3_11	-25.604	0.575	-0.190962	0.184767	0.409082	0.0317369	1.75333	0.207506	0.101755	0.154848	0.563241	0.00708813	2.69392	0.074485	0.611592	1.18841	1.02273	0.00908333	-0.00423902	0	0.0312494	0
4_2		0.266667	0.457435	6.78595	27.8552	0.0692692	5.31763	0.0580975	0.00591803	6.12994	23.974	8.70548e-12	4.4871	0.207308	1.87251e-17	3.06923	2.85358	0.0170855	-0.00616573	2.49412	0.125912	0.106115	0.330472	0.0197925
4_3		0.25	0.402281	30.762	54.6448	0.237561	6.19646	0.184292	1.02581e-136	24.7058	70.6135	1.11022e-16	4.55294	0.252857	1.53945e-75	1.71769	4.72504	0.0114637	-0.0165539	2.09539	0.220934	0.0969789	0.264934	0.0867906
4_8		0.35	0.16118	1.89267	8.84434	0.0395655	0.37342	0.152414	0.000277471	1.69396	2.98367	0.187424	4.10616	0.391497	2.57656e-08	1.21875	1.2	0.0278544	0.00379158	0	-0.00323856	0
5_4	-47.5409	0.283333	0.269913	12.6718	88.4956	0.470837	2.72921	0.125352	2.39499e-30	5.22962	27.2435	7.85683e-10	4.36443	0.316302	0	1.47493	2.39832	0.0175178	-0.0101148	1.4815	0.213037	0.13063	0.255636	0.0134289
6_15	-71.8821	0.2	0.472855	25.6706	66.9643	0.182362	5.22993	0.10105	7.46756e-39	24.425	25.4248	0.912591	4.79847	0.141313	2.60886e-21	0.998702	2.32165	0.0137133	-0.0108022	0	0.0980022	0
7_10	-551.978	0.333333	-0.284403	11.7621	24.8963	0.0894693	1.30575	0.0458704	0.0155604	8.13387	7.09459	1.85807e-07	1.25085	0.0398885	0.14608	0.864506	1.45593	0.0265142	-0.00787998	0	0.0106049	0
7_13	-351.978	0.308333	0.412949	16.8443	38.61	0.087819	2.65521	0.0905931	4.89621e-21	10.7275	41.68	8.73897e-19	4.48904	0.34161	0	1.60809	2.82241	0.0166042	-0.0167799	1.42615	0.14829	0.0372824	0.178999	0.0359798
7_14	-101.978	0.25	0.111877	25.752	64.6552	0.288547	2.58344	0.078805	6.05079e-25	14.7212	61.9732	3.33067e-16	3.81432	0.10479	1.32799e-55	1.75502	3.87643	0.0121938	-0.0193603	1.26234	0.175469	0.0831232	0.256009	0.0211697
7_15	-201.978	0.233333	0.517718	21.3777	122.951	0.53995	2.6786	0.141778	3.51581e-45	8.6366	36.3319	3.2885e-06	4.2798	0.0563507	1.1741e-09	1.71594	2.77559	0.0153385	-0.0137166	1.6206	0.143853	0.0453609	0.187471	0.025584
8_4		0.316667	0.0970581	8.7242	18.3599	0.113818	0.311581	0.245672	9.26496e-95	7.05432	12.1493	0.00427992	5.12312	0.268236	2.82567e-16	1.23614	1.54464	0.0208097	-0.00196454	1.21041	0.0339856	0.0484955	0.327981	0.0126207
8_12		0.391667	-0.232148	9.50699	18.4729	0.0188303	5.56535	0.221227	2.11122e-55	7.98256	8.24001	0.0761391	4.33824	0.145868	0.00114723	0.956067	1.52381	0.0206328	-0.0068712	0	-0.0250964	0
9_17		0.308333	-0.337506	32.4744	132.743	0.545012	6.21249	0.327416	4.64547e-271	18.9508	25.4221	0.000110828	5.03909	0.215372	5.56771e-53	1.11179	3.00759	0.0124463	-0.00413322	1.38876	0.0788251	0.0856637	0.187265	0.0294425
10_9	-41.8014	0.216667	-0.250868	10.0318	31.3808	0.147509	2.89066	0.0558467	0.479474	6.10174	17.3558	1.27428e-07	6.0544	0.0808901	0.000205383	1.30967	1.7931	0.0222796	-0.00533757	1.56049	0.104946	0.0929909	0.175999	0.0144624
11_17		0.283333	0.220256	10.2519	63.6943	0.305373	3.9812	0.195045	0.000122529	5.41547	13.8097	1.56936e-08	2.63349	0.0553789	0.00431245	1.35789	2.63738	0.0209241	-0.00804534	0	0.0675166	0
12_1	15.2616	0.175	0.754408	22.6699	55.8659	0.219504	1.57661	0.216755	0	17.5237	64.8798	6.27797e-18	4.53791	0.239742	0	1.5972	4.60092	0.0120433	-0.0217396	1.32171	0.345898	0.0926926	0.193245	0.0334651
12_12	-84.7384	0.191667	-0.00540864	27.9958	62.5	0.209951	0.641504	0.144767	4.84006e-94	24.9419	20.198	0.000863102	5.70005	0.0899313	4.85965e-36	0.889473	2.54168	0.0166331	-0.0152598	1.26754	-0.00477682	0.0482647	0.237651	0.0473352
12_13	-184.738	0.291667	0.204065	6.74032	90.3614	0.501688	0.0627724	0.163849	1.60601e-16	3.89531	3.87153	0.00177435	4.9045	0.115138	4.79673e-12	1.36545	1.64989	0.0209236	-0.0010848	0	0.0299312	0
13_6		0.333333	-0.0783763	10.5637	31.4136	0.109426	1.59818	0.349742	2.44985e-246	9.60066	17.8704	3.76706e-11	3.12094	0.0245651	0.337952	1.10156	1.9299	0.0253163	-0.0117371	1.16422	0.143046	0.0473302	0.118221	0.0237085
13_17	70.4536	0.341667	0.313841	4.03835	7.47384	0.0144873	2.18887	0.306324	1.14565e-61	3.55113	9.34567	3.76987e-08	3.21534	0.206394	3.96595e-18	1.15007	1.42504	0.0344056	-0.00953707	1.22477	0.0565019	0.0404235	0.256899	0.0172594
13_18	24.7227	0.591667	0.0170837	4.13177	8.68558	0.0222414	1.64821	0.366026	1.30039e-87	3.79102	5.76587	5.22084e-07	0.878579	0.31577	1.44195e-26	1.07008	1.3304	0.0371904	-0.00684288	0	0.0731638	0
13_37	-25.2773	0.258333	0.280803	16.7212	41.1523	0.118875	1.9644	0.270854	6.26387e-190	14.6361	54.0311	2.55668e-17	4.10859	0.39666	0	1.38726	4.06317	0.0141736	-0.0215665	1.00847	0.347689	0.0127763	0.399727	0.144068
13_45	-50.2773	0.583333	-0.0359385	3.51272	6.01685	0.00530991	1.84131	0.110716	3.76562e-05	3.13442	3.04522	0.0209437	5.27722	0.358223	1.45033e-18	0.794224	1.1558	0.0360527	0.000137319	0.990228	0.0552271	-0.0114596	0.321744	0.01812
14_8	-108.696	0.316667	-0.631916	3.35431	5.9761	0.00355018	0.616353	0.503958	0	3.15137	3.21682	3.17319e-08	0.58664	0.519172	2.14142e-166	1.04701	1.13021	0.0271431	-0.00259796	0.934137	-0.030733	0.0458198	0.38544	0.00442742
14_13	-208.696	0.225	0.619235	3.20667	6.5703	0.0485761	1.98587	0.345461	0	2.9768	5.19584	5.66214e-15	4.17077	0.237742	1.95467e-53	1.15562	1.19899	0.0245686	-0.00518698	0	0.0235708	0
14_22	-108.696	0.508333	-0.533957	8.75107	15.528	0.0440869	2.20074	0.224871	6.11186e-298	8.36699	6.7122	5.24875e-20	3.99679	0.137721	3.54249e-23	0.908845	1.28346	0.0257776	-0.0044688	1.08706	-0.0444338	0.0823756	0.404285	0.0182171
15_15		0.183333	0.439012	9.43551	18.105	0.124467	1.26218	0.237876	0	8.78065	15.6587	7.77156e-16	4.46311	0.148068	5.34426e-46	1.12737	1.6625	0.0245997	-0.0094137	0	0.0552953	0
15_17		0.325	0.924708	5.51257	40.107	0.0658699	1.40725	0.335616	3.29103e-221	5.27847	2.66211	1.08389e-07	4.24243	0.358973	3.48989e-47	1.20265	1.42308	0.0230281	-0.00364825	0	0.0528486	0
18_10	-10.9199	0.241667	0.563975	16.379	41.0959	0.165308	2.93575	0.314492	0	15.2989	21.9577	2.1023e-09	3.94612	0.205949	0	1.01972	1.88654	0.0182815	-0.00764614	1.22158	0.00826389	0.0470971	0.436204	0.0311432
18_11	314.08	0.583333	-0.286067	8.1408	23.166	0.0113414	0.927007	0.485847	0	7.88245	2.10492	4.72105e-21	3.18401	0.0723022	0.000202783	0.652306	1.28063	0.0175711	-0.00770503	1.13196	-0.0461478	0.0780097	0.198798	0.0108352
18_13	289.08	0.675	-0.441063	4.9817	9.14077	0.165818	0.429573	0.108329	4.25006e-40	4.79511	1.63313	1.35166e-22	3.23675	0.128277	6.69114e-10	0.66062	1.23451	0.0154731	-0.00518186	1.2397	-0.0578329	0.0446873	0.228031	0.00637954
18_23	439.08	0.591667	-0.18337	8.38985	24.2326	0.0306645	0.943122	0.300573	6.63276e-274	8.09769	2.4374	5.12672e-09	2.95021	0.0303264	0.172798	0.865305	1.735	0.0147859	-0.00766556	0	-0.0794602	0
18_29	139.08	0.591667	-0.0580699	2.52486	5.27937	0.111767	2.43871	0.0746311	2.57059e-13	2.40134	1.64015	3.58189e-09	3.41036	0.20446	2.69673e-24	0.8241	1.14742	0.0178031	-0.00231245	0	-0.0445756	0
18_41	314.08	0.583333	-0.336534	1.25935	7.21154	0.174959	1.72773	0.146653	2.41012e-19	1.20635	0.364088	2.85179e-17	3.12245	0.204213	5.70174e-06	0.607051	1.35808	0.0129752	-0.00987744	0	-0.0263025	0
19_16	225.425	0.333333	0.283499	6.99447	24.4898	0.0386757	1.58901	0.483329	0	6.25352	5.31477	5.30676e-09	1.05434	0.268793	2.71144e-106	0.845926	1.31602	0.0247727	0.00417037	1.56357	0.0231471	0.0653023	0.348598	0.0122207
19_22	0.425105	0.291667	0.466672	10.0748	23.4192	0.0215653	2.50063	0.285317	0	9.47367	11.933	1.04435e-06	3.32387	0.220586	8.61214e-160	0.889102	1.41297	0.0223504	-0.00274348	0.991571	-0.0178296	-0.000377515	0.370362	0.0191591
